# Supplementary material for: Genome-Wide Analysis of LRR-RLK Gene Family in Four <em>Gossypium</em> Species and Expression Analysis during Cotton Development and Stresses Response
Source: Preprints.org preprint supplement (doi:10.20944/preprints201809.0611.v1), 2018-09-30

Figure S3: Chromosomal location of LRR-RLK genes from four *Gossypium* species.

LRR-RLK genes from *G. arboreum*, *G. barbadense*, *G. hirsutum*, *G. raimondii* were mapped to chromosomes based on chromosomal coordinates extracted from gene feature annotation files (shown by A, B, C, D, respectively). LRR-RLK genes located on scaffolds were not shown. Tandem duplication gene sets were highlighted by red border rectangles to represent.

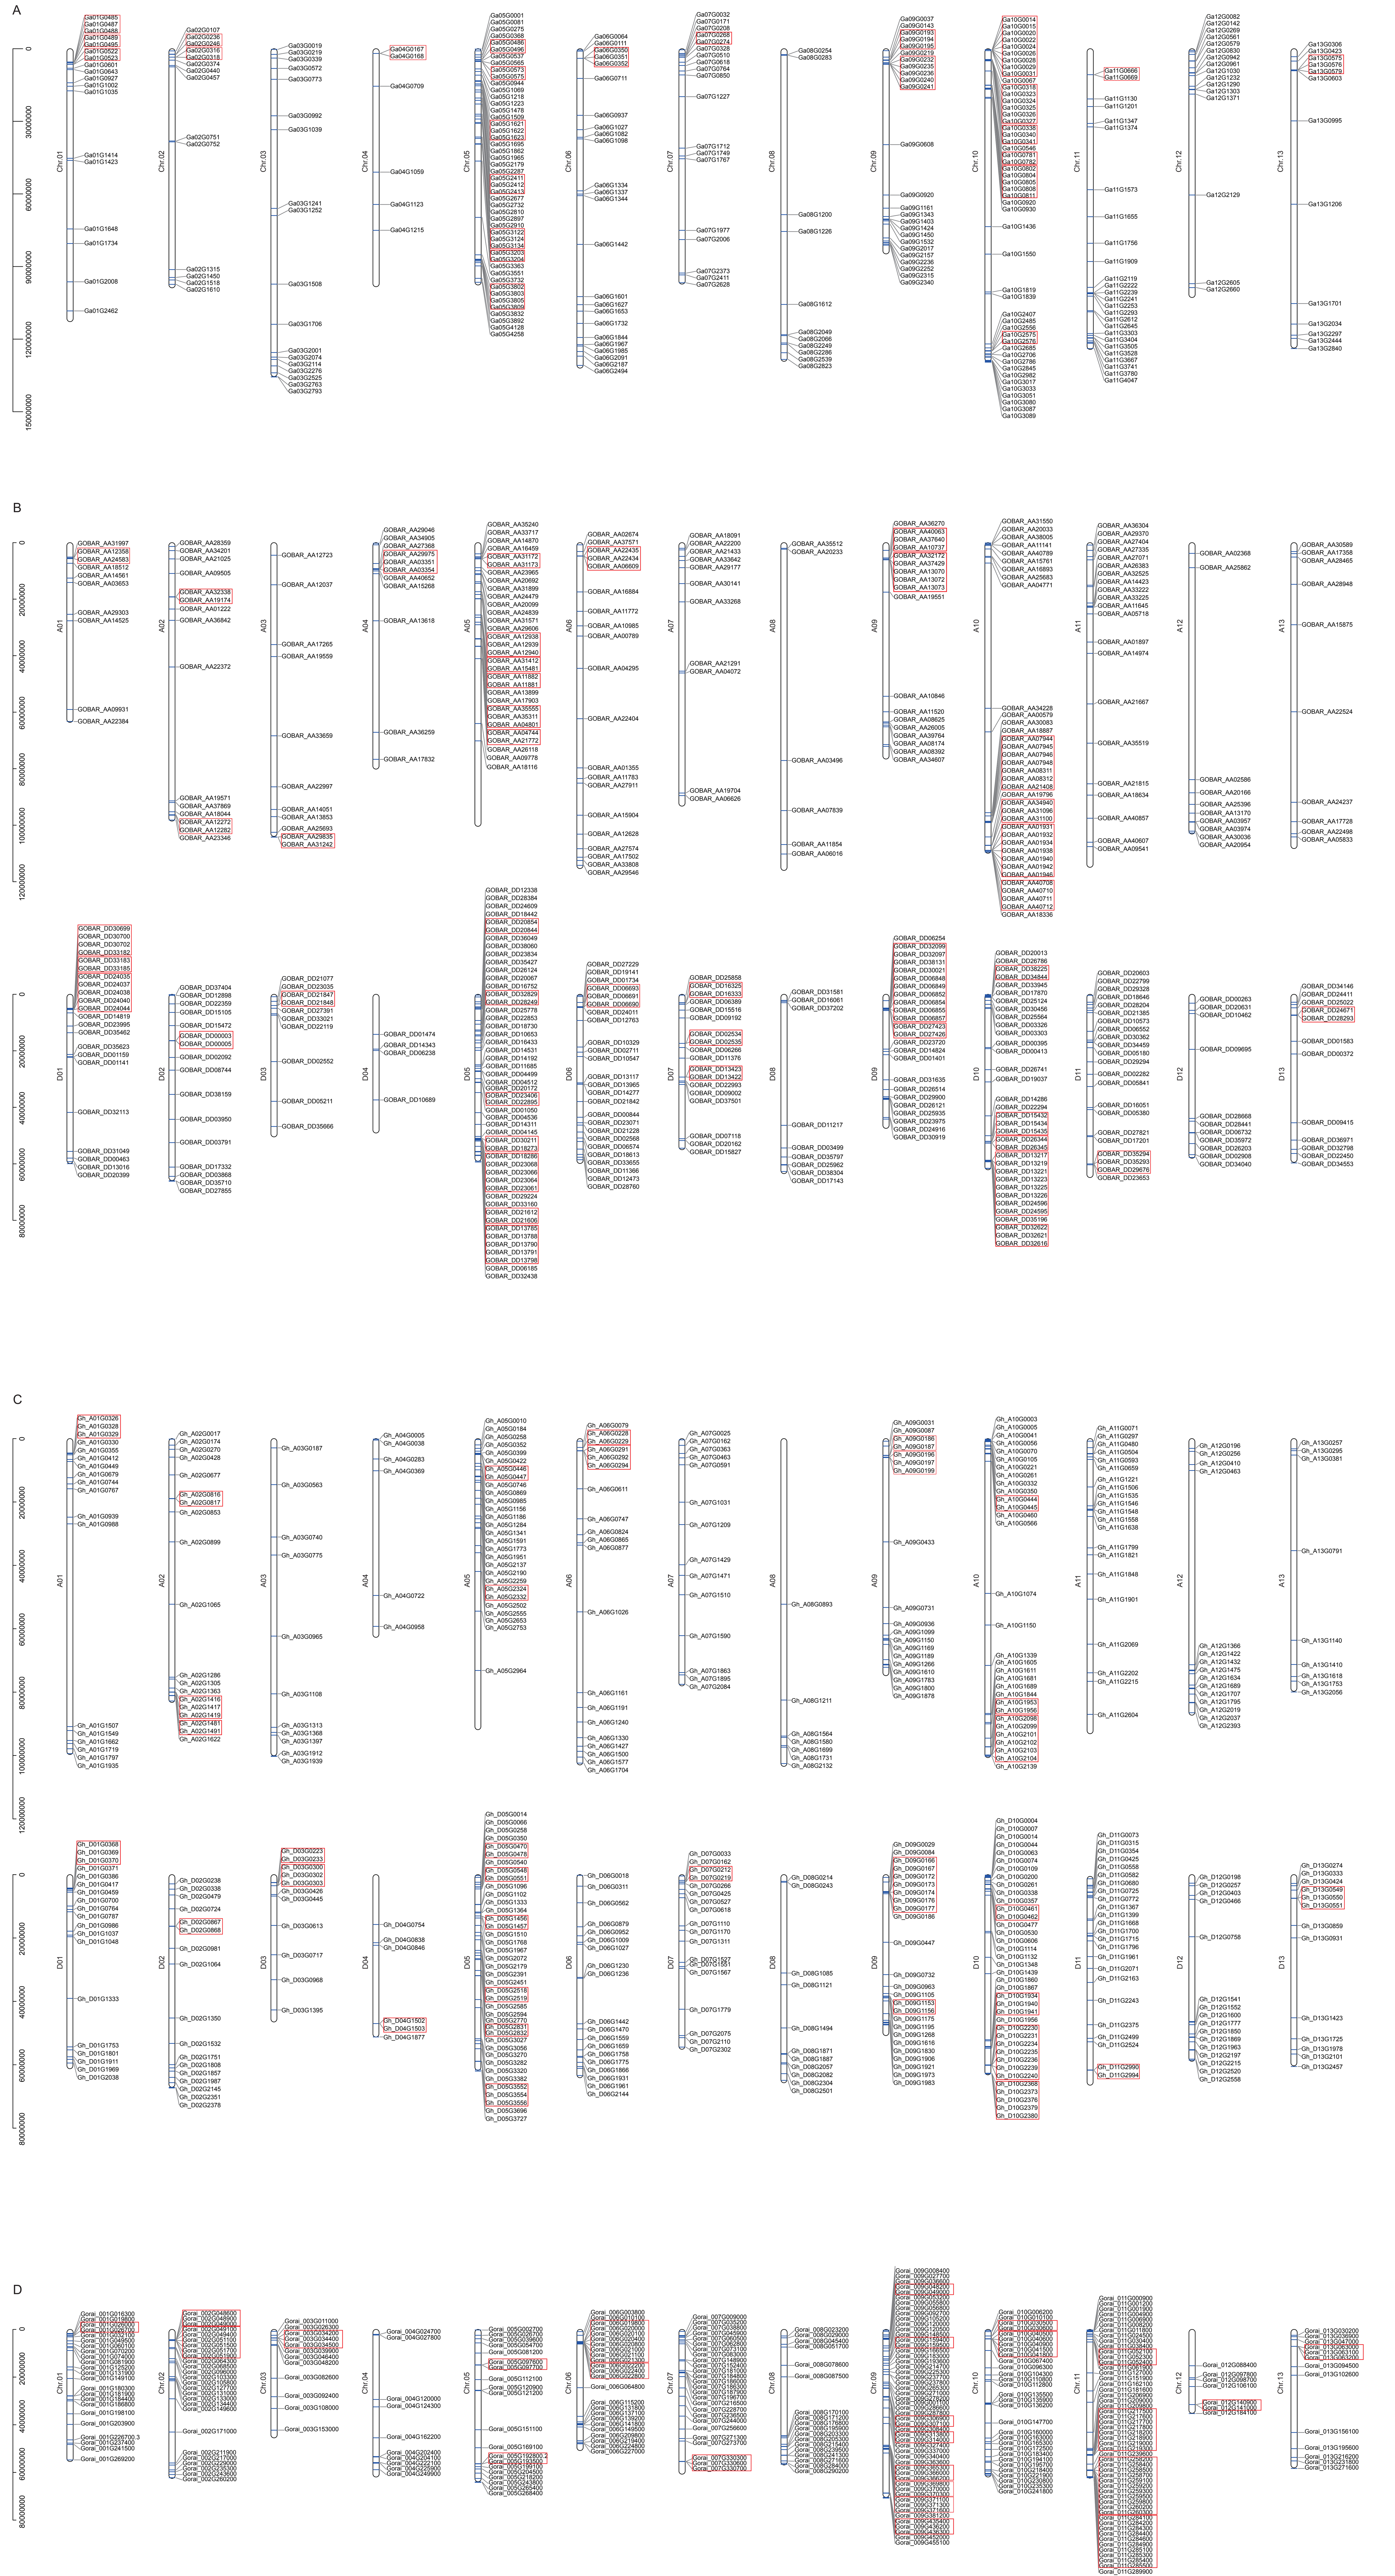

Supplement: Supplementary file 2 [file supplementary]
