# Supplementary material for: Genome-Wide Analysis of LRR-RLK Gene Family in Four <em>Gossypium</em> Species and Expression Analysis during Cotton Development and Stresses Response
Source: Preprints.org preprint supplement (doi:10.20944/preprints201809.0611.v1), 2018-09-30
Supplement: Supplementary file 4 [file supplementary]

**Figure S1: Domain and exon-intron organization of identified LRR-RLK family gene members in *A. thaliana* and *Gossypium*.**

Exon-intron structures of all identified LRR-RLK genes from four *Gossypium* species and *A. thaliana*. LRR, KD and TM domain coding regions were marked on exons by different colored rectangles. 21 subfamilies were distinguished by different color branches.

(see file Figure S1.pdf)

**Figure S2: NJ tree constructed by MEGA 7 based on LRR-RLK family members of *A. thaliana* and *Gossypium*.**

Amino acid sequences of LRR-RLKs from *A. thaliana* and *Gossypium* were aligned by MUSCLE software with default parameters. Aligned sequences were used to construct NJ tree by MEGA 7 with 1000 bootstraps. Only topology of tree was displayed. Bootstrap values lower than 50 were hidden.

(see file Figure S2.pdf)

**Figure S3: Chromosomal location of LRR-RLK genes from four *Gossypium* species.**

LRR-RLK genes from *G. arboreum*, *G. barbadense*, *G. hirsutum*, *G. raimondii* were mapped to chromosomes based on chromosomal coordinates extracted from gene feature annotation files (shown by A, B, C, D, respectively). LRR-RLK genes located on scaffolds were not shown. Tandem duplication gene sets were highlighted by red border rectangles to represent.

(see file Figure S3.pdf)

**Table S1: Statistics of *A. thaliana* and *Gossypium* LRR-RLK genes distribution among different subfamilies.**

For both *A. thaliana* and four *Gossypium* species, number of LRR-RLK genes belonged to each subfamily was counted respectively, the corresponding percentage of subfamily in all LRR-RLK from specific species was computed and indicated in brackets.

**Table S2: Number and percentage of tandem duplication genes in *Gossypium* LRR-RLK family.**

For each LRR-RLK subfamily, the number of tandem duplication genes was counted, the percentage of tandem duplication genes out of all subfamily members was computed and indicated in brackets.

**Table S3: Statistics of cis-acting regulatory elements found by PlantCARE in promoter regions of *Gossypium* LRR-RLK genes.**

Based on PlantCARE analysis results, 121 kinds of cis-acting regulatory elements were found in promoters of *Gossypium* LRR-RLK genes. Number of each kind of cis-acting elements found in specific species was counted.

**Table S4: Statistics of TF binding sites predicted in promoter regions of *Gossypium* LRR-RLK genes.**

TF binding sites analysis showed that *Gossypium* LRR-RLK genes could be regulated by TFs belonged to as many as 39 TF families. Number of LRR-RLK genes regulated by each TF family were counted for *G. arboreum*, *G. hirsutum* and *G. raimondii*, respectively.

Table S1

| Subfamily | Number (percentage) of LRR-RLK genes in each subfamily |                    |                      |                    |                     |
|-----------|--------------------------------------------------------|--------------------|----------------------|--------------------|---------------------|
|           | <i>A. thaliana</i>                                     | <i>G. arboreum</i> | <i>G. barbadense</i> | <i>G. hirsutum</i> | <i>G. raimondii</i> |
| I         | 41 (19.2%)                                             | 4 (1.3%)           | 6 (1.2%)             | 7 (1.4%)           | 3 (0.9%)            |
| II        | 14 (6.6%)                                              | 17 (5.7%)          | 23 (4.5%)            | 29 (5.6%)          | 18 (5.7%)           |
| III       | 41 (19.2%)                                             | 45 (15.1%)         | 68 (13.3%)           | 83 (16.1%)         | 46 (14.5%)          |
| IV        | 3 (1.4%)                                               | 5 (1.7%)           | 10 (2.0%)            | 10 (1.9%)          | 5 (1.6%)            |
| V         | 9 (4.2%)                                               | 10 (3.4%)          | 15 (2.9%)            | 19 (3.7%)          | 9 (2.8%)            |
| VI-1      | 5 (2.3%)                                               | 7 (2.3%)           | 11 (2.2%)            | 14 (2.7%)          | 7 (2.2%)            |
| VI-2      | 4 (1.9%)                                               | 2 (0.7%)           | 2 (0.4%)             | 6 (1.2%)           | 3 (0.9%)            |
| VII-1     | 2 (0.9%)                                               | 4 (1.3%)           | 11 (2.2%)            | 7 (1.4%)           | 4 (1.3%)            |
| VII-2     | 5 (2.3%)                                               | 6 (2.0%)           | 6 (1.2%)             | 12 (2.3%)          | 6 (1.9%)            |
| VIII-1    | 8 (3.8%)                                               | 4 (1.3%)           | 7 (1.4%)             | 7 (1.4%)           | 4 (1.3%)            |
| VIII-2    | 12 (5.6%)                                              | 17 (5.7%)          | 26 (5.1%)            | 30 (5.8%)          | 17 (5.4%)           |
| IX        | 4 (1.9%)                                               | 12 (4.0%)          | 18 (3.5%)            | 19 (3.7%)          | 11 (3.5%)           |
| X         | 15 (7.0%)                                              | 18 (6.0%)          | 32 (6.3%)            | 35 (6.8%)          | 18 (5.7%)           |
| XI-1      | 28 (13.1%)                                             | 75 (25.2%)         | 135 (26.4%)          | 132 (25.6%)        | 81 (25.6%)          |
| XI-2      | 2 (0.9%)                                               | 3 (1.0%)           | 3 (0.6%)             | 7 (1.4%)           | 3 (0.9%)            |
| XI-3      | 2 (0.9%)                                               | 1 (0.3%)           | 1 (0.2%)             | 2 (0.4%)           | 1 (0.3%)            |
| XII       | 7 (3.3%)                                               | 49 (16.4%)         | 102 (20.0%)          | 61 (11.8%)         | 63 (19.9%)          |
| XIII-1    | 3 (1.4%)                                               | 3 (1.0%)           | 6 (1.2%)             | 5 (1.0%)           | 2 (0.6%)            |
| XIII-2    | 3 (1.4%)                                               | 3 (1.0%)           | 6 (1.2%)             | 6 (1.2%)           | 3 (0.9%)            |
| XIV       | 2 (0.9%)                                               | 5 (1.7%)           | 10 (2.0%)            | 9 (1.7%)           | 5 (1.6%)            |
| XV        | 3 (1.4%)                                               | 8 (2.7%)           | 13 (2.5%)            | 15 (2.9%)          | 8 (2.5%)            |

Table S2

| Subfamily | Number of tandem duplication genes |                      |                    |                     |
|-----------|------------------------------------|----------------------|--------------------|---------------------|
|           | <i>G. arboreum</i>                 | <i>G. barbadense</i> | <i>G. hirsutum</i> | <i>G. raimondii</i> |
| II        | 5 (29.4%)                          | 2 (8.7%)             | 5 (17.2%)          | 5 (27.8%)           |
| III       | 2 (4.4%)                           | 4 (5.9%)             | 4 (4.8%)           | 2 (4.3%)            |
| IX        |                                    | 2 (11.1%)            |                    |                     |
| VII-1     |                                    | 4 (36.4%)            |                    |                     |
| VIII-2    | 10 (58.8%)                         | 11 (42.3%)           | 14 (46.7%)         | 11 (64.7%)          |
| XI-1      | 31 (41.3%)                         | 59 (43.7%)           | 42 (31.8%)         | 35 (43.2%)          |
| XI-2      |                                    |                      | 2 (28.6%)          |                     |
| XII       | 31 (63.3%)                         | 64 (62.7%)           | 25 (41.0%)         | 43 (68.3%)          |

Table S3

| Cis-acting regulatory element name<br>(ID of CARE) | Number of elements found in promoters of LRR-RLK genes |                      |                    |                     |
|----------------------------------------------------|--------------------------------------------------------|----------------------|--------------------|---------------------|
|                                                    | <i>G. arboreum</i>                                     | <i>G. barbadense</i> | <i>G. hirsutum</i> | <i>G. raimondii</i> |
| CAAT-box                                           | 298                                                    | 509                  | 515                | 310                 |
| TATA-box                                           | 298                                                    | 504                  | 514                | 309                 |
| AT-TATA-box                                        | 243                                                    | 413                  | 407                | 265                 |
| TATA                                               | 169                                                    | 268                  | 256                | 178                 |
| A-box                                              | 25                                                     | 42                   | 48                 | 23                  |
| Myb                                                | 285                                                    | 469                  | 492                | 288                 |
| AT-rich element                                    | 41                                                     | 71                   | 62                 | 55                  |
| MYC                                                | 279                                                    | 450                  | 479                | 274                 |
| as-1                                               | 149                                                    | 216                  | 228                | 150                 |
| MBS                                                | 101                                                    | 166                  | 196                | 95                  |
| DRE core                                           | 17                                                     | 28                   | 33                 | 24                  |
| ACTCATCCT sequence                                 | 5                                                      | 6                    | 6                  | 3                   |
| DRE1                                               | 12                                                     | 18                   | 17                 | 10                  |
| MYB recognition site                               | 50                                                     | 69                   | 76                 | 57                  |
| LTR                                                | 79                                                     | 150                  | 168                | 98                  |
| STRE                                               | 202                                                    | 337                  | 347                | 177                 |
| TCA                                                | 80                                                     | 133                  | 143                | 68                  |
| ARE                                                | 236                                                    | 378                  | 402                | 229                 |
| GC-motif                                           | 16                                                     | 34                   | 32                 | 23                  |
| TC-rich repeats                                    | 110                                                    | 167                  | 181                | 108                 |
| W box                                              | 149                                                    | 256                  | 252                | 158                 |
| WUN-motif                                          | 128                                                    | 209                  | 213                | 128                 |
| WRE3                                               | 90                                                     | 157                  | 173                | 94                  |
| box S                                              | 27                                                     | 42                   | 45                 | 23                  |
| W box                                              | 149                                                    | 256                  | 252                | 158                 |
| GT1-motif                                          | 178                                                    | 296                  | 305                | 192                 |
| TCT-motif                                          | 144                                                    | 237                  | 248                | 130                 |
| GATA-motif                                         | 117                                                    | 184                  | 191                | 113                 |
| MRE                                                | 92                                                     | 136                  | 141                | 95                  |
| AE-box                                             | 86                                                     | 144                  | 167                | 76                  |
| I-box                                              | 69                                                     | 111                  | 103                | 65                  |
| TCCC-motif                                         | 62                                                     | 88                   | 106                | 59                  |
| ATCT-motif                                         | 59                                                     | 93                   | 95                 | 55                  |
| AT1-motif                                          | 49                                                     | 75                   | 77                 | 44                  |
| GA-motif                                           | 47                                                     | 84                   | 74                 | 53                  |
| chs-CMA1a                                          | 46                                                     | 98                   | 99                 | 57                  |
| LAMP-element                                       | 32                                                     | 56                   | 59                 | 27                  |
| 3-AF1 binding site                                 | 29                                                     | 44                   | 48                 | 28                  |
| ACE                                                | 24                                                     | 50                   | 48                 | 45                  |

|                  |     |     |     |     |
|------------------|-----|-----|-----|-----|
| Gap-box          | 23  | 24  | 31  | 15  |
| Sp1              | 23  | 42  | 52  | 32  |
| chs-CMA2a        | 19  | 32  | 27  | 16  |
| ATC-motif        | 13  | 21  | 28  | 14  |
| Box II           | 12  | 26  | 28  | 21  |
| AAAC-motif       | 11  | 10  | 12  | 6   |
| GTGGC-motif      | 7   | 8   | 10  | 3   |
| CAG-motif        | 5   | 9   | 8   | 9   |
| ACA-motif        | 4   | 8   | 9   | 9   |
| chs-Unit 1 m1    | 3   | 5   | 5   | 5   |
| L-box            | 3   | 9   | 8   | 5   |
| LS7              | 2   | 6   | 4   | 4   |
| 4cl-CMA2b        | 1   | 2   | 2   | 1   |
| Pc-CMA2c         | 1   | 2   | 2   | 2   |
| circadian        | 36  | 83  | 79  | 52  |
| ERE              | 226 | 354 | 370 | 242 |
| ABRE             | 160 | 268 | 299 | 175 |
| ABRE3a           | 56  | 81  | 101 | 68  |
| ABRE4            | 56  | 81  | 101 | 68  |
| ABRE2            | 2   | 3   | 6   | 2   |
| AT-ABRE          | 1   | 6   | 5   | 6   |
| P-box            | 68  | 117 | 130 | 68  |
| TATC-box         | 43  | 63  | 70  | 41  |
| GARE-motif       | 39  | 59  | 65  | 35  |
| CARE             | 19  | 39  | 40  | 21  |
| CGTCA-motif      | 149 | 216 | 228 | 150 |
| TGACG-motif      | 149 | 216 | 228 | 150 |
| JERE             | 2   | 3   | 4   | 2   |
| TCA-element      | 133 | 191 | 218 | 112 |
| TGA-element      | 60  | 93  | 87  | 71  |
| TGA-box          | 10  | 11  | 12  | 10  |
| AuxRR-core       | 23  | 50  | 48  | 35  |
| AuxRE            | 1   | 1   | 2   | 2   |
| Myb-binding site | 116 | 197 | 200 | 112 |
| CCGTCC motif     | 24  | 40  | 45  | 21  |
| MSA-like         | 11  | 20  | 18  | 9   |
| re2f-1           | 4   | 7   | 4   | 3   |
| NON              | 3   | 3   | 5   | 3   |
| dOCT             | 3   | 6   | 7   | 3   |
| E2Fb             | 2   | 4   | 7   | 4   |
| O2-site          | 80  | 126 | 137 | 80  |

|                       |     |     |     |     |
|-----------------------|-----|-----|-----|-----|
| MBSI                  | 28  | 41  | 39  | 24  |
| AP-1                  | 17  | 22  | 27  | 16  |
| CAT-box               | 71  | 128 | 132 | 89  |
| MYB-like sequence     | 171 | 283 | 299 | 166 |
| GCN4_motif            | 49  | 66  | 73  | 42  |
| RY-element            | 13  | 20  | 26  | 17  |
| AC-I                  | 10  | 9   | 14  | 6   |
| AC-II                 | 5   | 8   | 9   | 3   |
| AACA_motif            | 3   | 3   | 7   | 3   |
| telo-box              | 2   | 2   | 5   | 2   |
| motif I               | 1   | 1   | 2   | 3   |
| Box III               | 20  | 19  | 26  | 14  |
| HD-Zip 3              | 20  | 21  | 23  | 10  |
| AT-rich sequence      | 25  | 33  | 30  | 25  |
| HD-Zip 1              | 15  | 24  | 24  | 13  |
| Unnamed__4            | 293 | 499 | 510 | 304 |
| Unnamed__6            | 69  | 105 | 117 | 74  |
| Unnamed__1            | 136 | 252 | 247 | 146 |
| Unnamed__2            | 34  | 55  | 57  | 38  |
| Unnamed__10           | 6   | 14  | 14  | 15  |
| Unnamed__12           | 6   | 14  | 14  | 15  |
| Unnamed__14           | 6   | 14  | 14  | 15  |
| Unnamed__8            | 6   | 14  | 14  | 15  |
| Unnamed__16           | 2   | 1   | 1   | 1   |
| Unnamed__3            | 1   | 1   | 3   | 3   |
| AAGAA-motif           | 210 | 339 | 373 | 186 |
| CCAAT-box             | 50  | 69  | 76  | 57  |
| CCGTCC-box            | 24  | 40  | 45  | 21  |
| F-box                 | 22  | 32  | 40  | 21  |
| CTAG-motif            | 21  | 45  | 42  | 23  |
| 3-AF3 binding site    | 9   | 7   | 13  | 6   |
| Box II -like sequence | 1   | 2   | 3   | 1   |

**Table S4**

| TF family   | Number of TFs regulated LRR-RLK gene |                    |                     |
|-------------|--------------------------------------|--------------------|---------------------|
|             | <i>G. arboreum</i>                   | <i>G. hirsutum</i> | <i>G. raimondii</i> |
| AP2         | 188                                  | 335                | 159                 |
| ARF         | 35                                   | 83                 | 49                  |
| ARR-B       | 8                                    | 10                 | 3                   |
| B3          | 42                                   | 78                 | 58                  |
| BBR-BPC     | 137                                  | 275                | 107                 |
| BES1        | 23                                   | 42                 | 35                  |
| bHLH        | 98                                   | 197                | 106                 |
| bZIP        | 73                                   | 144                | 82                  |
| C2H2        | 172                                  | 315                | 172                 |
| C3H         | 6                                    | 13                 | 6                   |
| CAMTA       | 15                                   | 28                 | 20                  |
| CPP         | 19                                   | 43                 | 36                  |
| Dof         | 231                                  | 418                | 215                 |
| E2F/DP      | 11                                   | 18                 | 10                  |
| EIL         | 13                                   | 29                 | 14                  |
| ERF         | 156                                  | 301                | 150                 |
| FAR1        | 21                                   | 20                 | 14                  |
| G2-like     | 57                                   | 114                | 67                  |
| GATA        | 99                                   | 168                | 84                  |
| GRAS        | 132                                  | 244                | 97                  |
| HD-ZIP      | 62                                   | 142                | 62                  |
| HSF         | 25                                   | 38                 | 20                  |
| LBD         | 63                                   | 123                | 59                  |
| LFY         | 3                                    | 4                  | 4                   |
| MIKC_MADS   | 213                                  | 373                | 193                 |
| MYB         | 195                                  | 354                | 200                 |
| MYB_related | 49                                   | 93                 | 63                  |
| NAC         | 100                                  | 169                | 87                  |
| Nin-like    | 44                                   | 115                | 41                  |
| RAV         | 14                                   | 25                 | 14                  |
| SBP         | 13                                   | 33                 | 19                  |
| SRS         | 4                                    | 9                  | 4                   |
| TALE        | 107                                  | 195                | 89                  |
| TCP         | 101                                  | 164                | 114                 |
| Trihelix    | 84                                   | 141                | 77                  |
| WOX         | 18                                   | 41                 | 30                  |
| WRKY        | 93                                   | 150                | 83                  |
| YABBY       | 2                                    | 6                  | 5                   |
| ZF-HD       | 28                                   | 21                 | 22                  |
